# Supplementary material for: Redox-switchable host–guest systems based on a bisthiotetrathiafulvalene-bridged cryptand
Source: Royal Society of Chemistry journal article supplement (doi:10.1039/c4cc07770a), 2014-10-27
Supplement: c4cc07770a1.pdf [file c4cc07770a1.pdf]

## Electronic Supplementary Information

### Redox-switchable host-guest systems based on a bisthiotetrathiafulvalene-bridged cryptand

Qi Wang,<sup>a</sup> Ming Cheng,<sup>a</sup> Yue Zhao,<sup>b</sup> Zhen Yang,<sup>a</sup> Juli Jiang,<sup>\*a</sup> Leyong Wang<sup>\*a</sup> and Yi Pan<sup>b</sup>

<sup>a</sup> Key Laboratory of Mesoscopic Chemistry of MOE, School of Chemistry and Chemical Engineering, Nanjing University, Nanjing 210093, China;

<sup>b</sup> State Key Laboratory of Coordination Chemistry, School of Chemistry and Chemical Engineering, Nanjing University, Nanjing 210093, China.

Fax: +86 25-83597090; Tel: +86 25-83592529;

E-mail: [jjl@nju.edu.cn](mailto:jjl@nju.edu.cn) (JJ); [lywang@nju.edu.cn](mailto:lywang@nju.edu.cn) (LW).

#### Table of Contents

|                                                                                          |     |
|------------------------------------------------------------------------------------------|-----|
| 1. Materials and methods.....                                                            | S2  |
| 2. Synthesis of compound 1 .....                                                         | S3  |
| 3. <sup>1</sup> H NMR spectra of 1, 1⇌2 and 1⇌3 in CD <sub>3</sub> CN.....               | S6  |
| 4. Partial 2D NOESY spectra of 1⇌2 and 1⇌3 .....                                         | S8  |
| 5. Job plots for the complexes of 1⇌2 and 1⇌3.....                                       | S9  |
| 6. LR-ESI-MS for the complexes of 1⇌2 and 1⇌3.....                                       | S10 |
| 7. Determination of the association constants of 1⇌2 and 1⇌3 by <sup>1</sup> H NMR ..... | S11 |
| 8. Studies of charge transfer interactions by UV-vis spectra.....                        | S11 |
| 9. Switchable behaviors of 1⇌2 investigated by <sup>1</sup> H NMR experiment.....        | S14 |
| 10. Redox-responsive complexation between 1 and 3 .....                                  | S15 |
| 11. <sup>1</sup> H NMR spectrum of the single crystal of 1⇌2.....                        | S16 |
| 12. X-ray crystal data for 1⇌2.....                                                      | S16 |

## *1. Materials and methods*

All reactions were performed in atmosphere unless noted. The commercially available reagents and solvents were either employed as purchased or dried according to procedures described in the literature. Compounds **2**,<sup>S1</sup> **3**,<sup>S2</sup> **4**<sup>S3</sup> and **5**<sup>S4</sup> were prepared by published literature procedures. NMR spectra were recorded on a Bruker DPX 300 MHz or 400 MHz spectrometer with internal standard tetramethylsilane (TMS) and solvent signals as internal references, and the chemical shifts ( $\delta$ ) were expressed in ppm and  $J$  values were given in Hz. 2D NOESY experiments were performed on a Bruker DPX 400 MHz spectrometer. Low-resolution electrospray ionization mass spectra (LR-ESI-MS) were obtained on Finnigan MatTSQ 7000 instruments. High-resolution electrospray ionization mass spectra (HR-ESI-MS) were recorded on an Agilent 6540Q-TOF LCMS equipped with an electrospray ionization (ESI) probe operating in positive-ion mode with direct infusion.

## 2. Synthesis of compound **1**

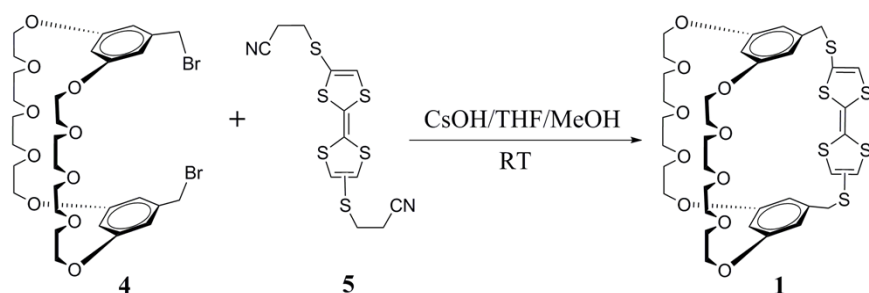

**Scheme S1** Synthesis of cryptand **1**.

A solution of **4** (0.39 g, 0.54 mmol) and **5** (0.20 g, 0.54 mmol) in anhydrous THF (100 mL) was added very slowly to a solution of CsOH·H<sub>2</sub>O (0.45 g, 2.70 mmol) in anhydrous THF (200 mL) and MeOH (20 mL) under nitrogen gas protection.<sup>S5</sup> After complete addition, the mixture was stirred for 2 days. After the solvent was removed under vacuum, the residue was purified by column chromatography (silica, CH<sub>2</sub>Cl<sub>2</sub>/CH<sub>3</sub>OH = 100:1, v/v) to afford **1** as a yellow wax (0.17 g, 38%). <sup>1</sup>H NMR (400 MHz, DMSO-*d*<sub>6</sub>): δ (ppm): 6.85 (s, 1H), 6.66 (s, 1H), 6.48 (d, *J* = 1.9 Hz, 2H), 6.39–6.37 (m, 3H), 6.33 (t, *J* = 1.9 Hz, 1H), 4.00–3.96 (m, 8H), 3.85–3.83 (m, 4H), 3.63–3.61 (m, 4H), 3.52 (br s, 20H). <sup>13</sup>C NMR (75 MHz, DMSO-*d*<sub>6</sub>): δ (ppm): 159.5, 159.4, 139.2, 139.0, 125.2, 124.7, 124.3, 122.5, 113.0, 111.6, 107.5, 106.9, 100.7, 100.4, 70.1, 70.0, 69.91, 68.85, 68.8, 67.19, 67.15. LR-ESI-MS: *m/z* calcd for [M + H]<sup>+</sup>, 829.13, found 829.05 (23%); calcd for [M + NH<sub>4</sub>]<sup>+</sup>, 846.16, found 846.10 (100%); calcd for [M + Na]<sup>+</sup>, 851.12, found 851.00 (35%); HR-ESI-MS: *m/z* calcd for [M + Na]<sup>+</sup> C<sub>36</sub>H<sub>44</sub>O<sub>10</sub>S<sub>6</sub>Na<sup>+</sup>, 851.1156, found 851.1153, error 0.4 ppm.

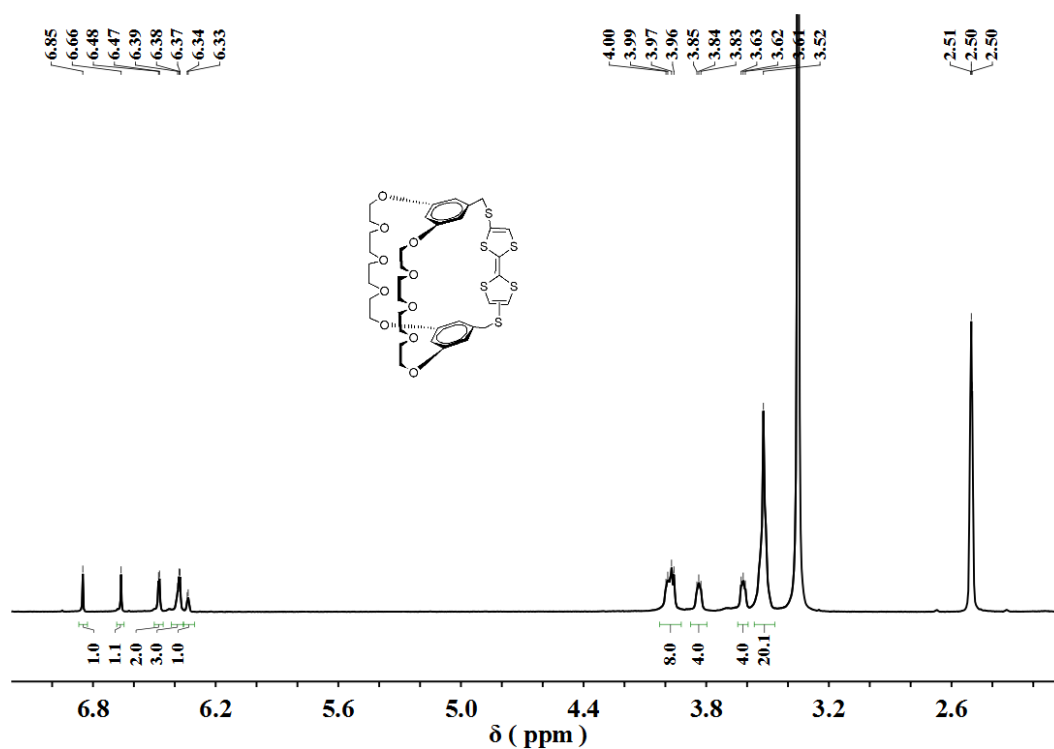

Fig. S1 <sup>1</sup>H NMR spectrum (400 MHz, DMSO-*d*<sub>6</sub>, 298 K) of 1.

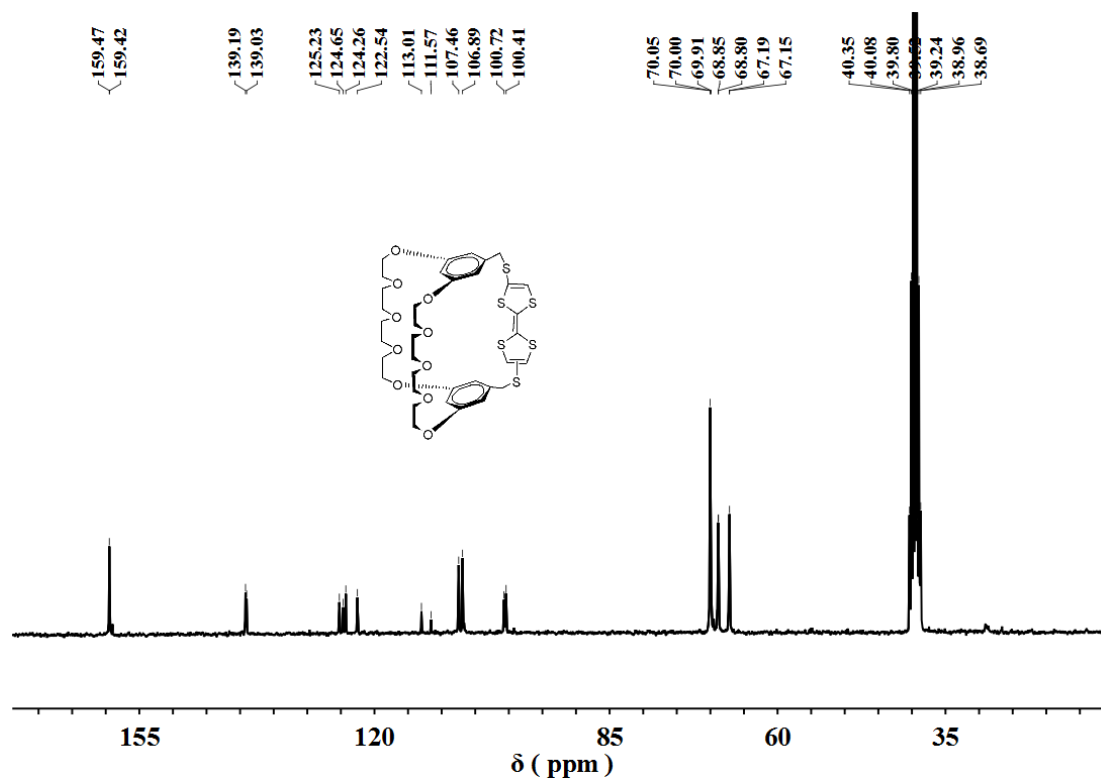

Fig. S2 <sup>13</sup>C NMR spectrum (75 MHz, DMSO-*d*<sub>6</sub>, 298 K) of 1.

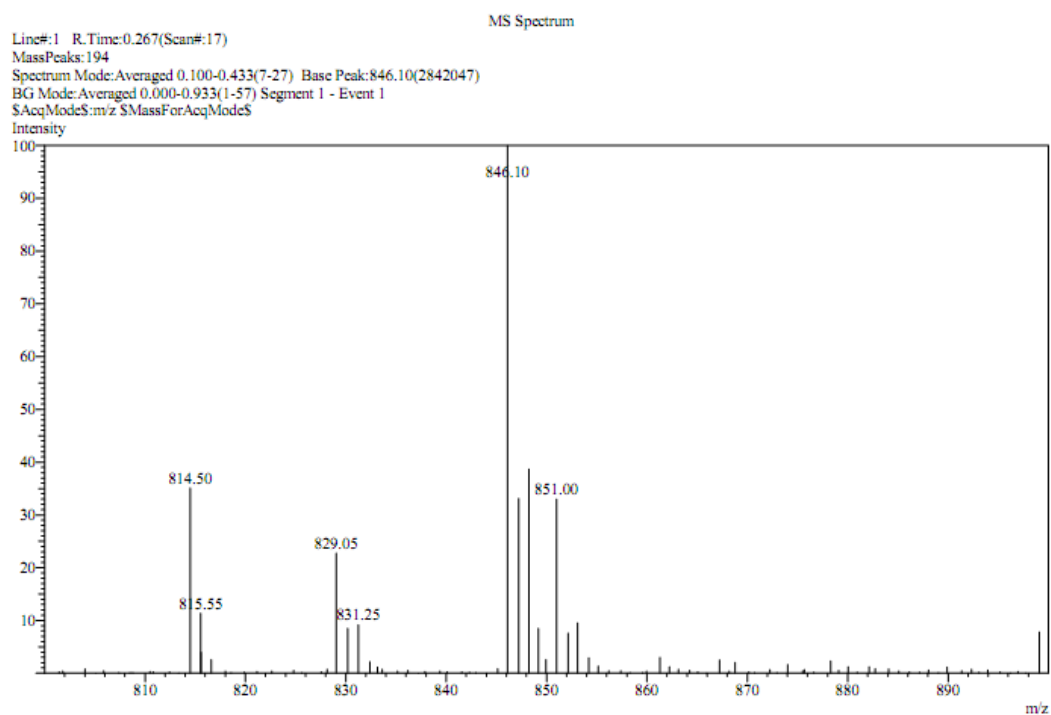

**Fig. S3** LR-ESI-MS spectrum of **1**.

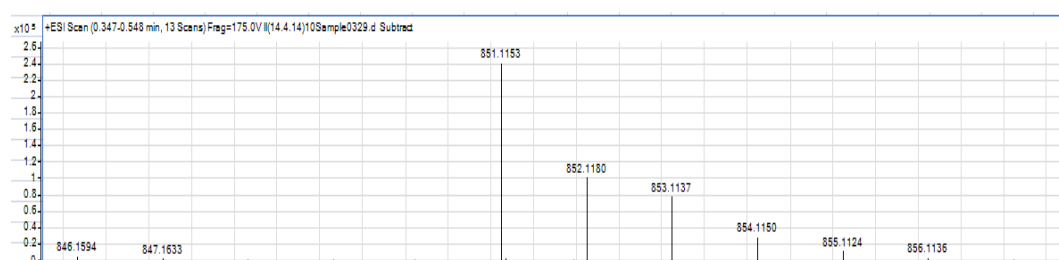

**Fig. S4** HR-ESI-MS spectrum of **1**.

3.  $^1\text{H}$  NMR spectra of **1**, **1**↔**2** and **1**↔**3** in  $\text{CD}_3\text{CN}$

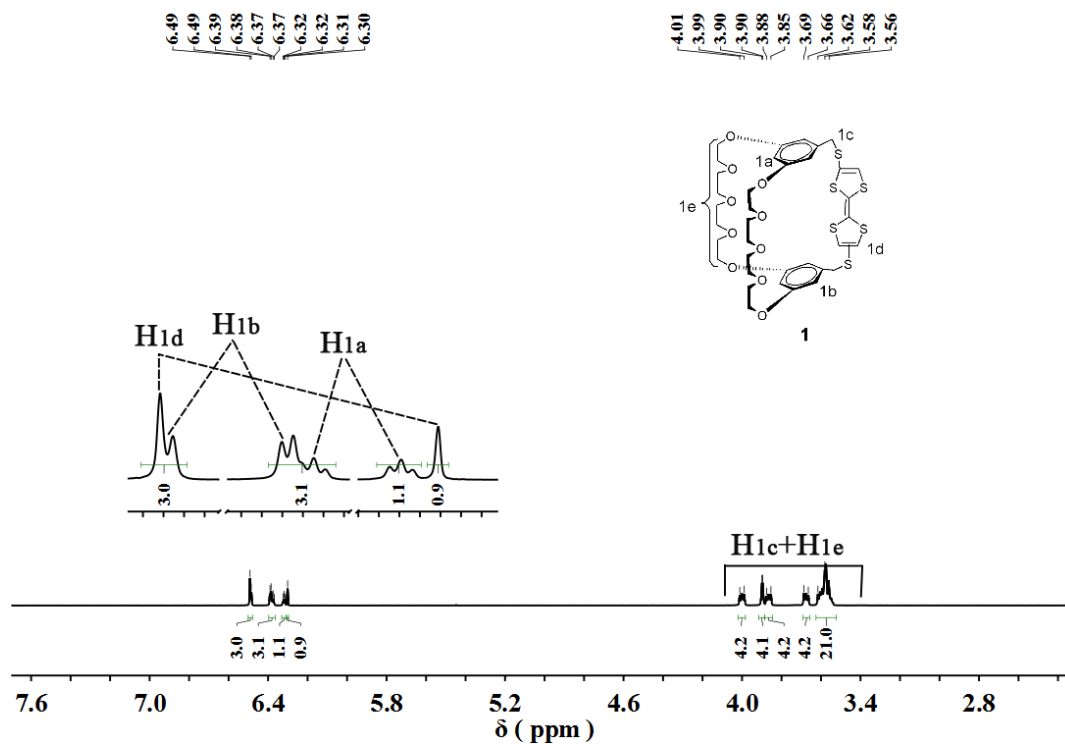

Fig. S5  $^1\text{H}$  NMR spectrum (400 MHz,  $\text{CD}_3\text{CN}$ , 298 K) of **1**.

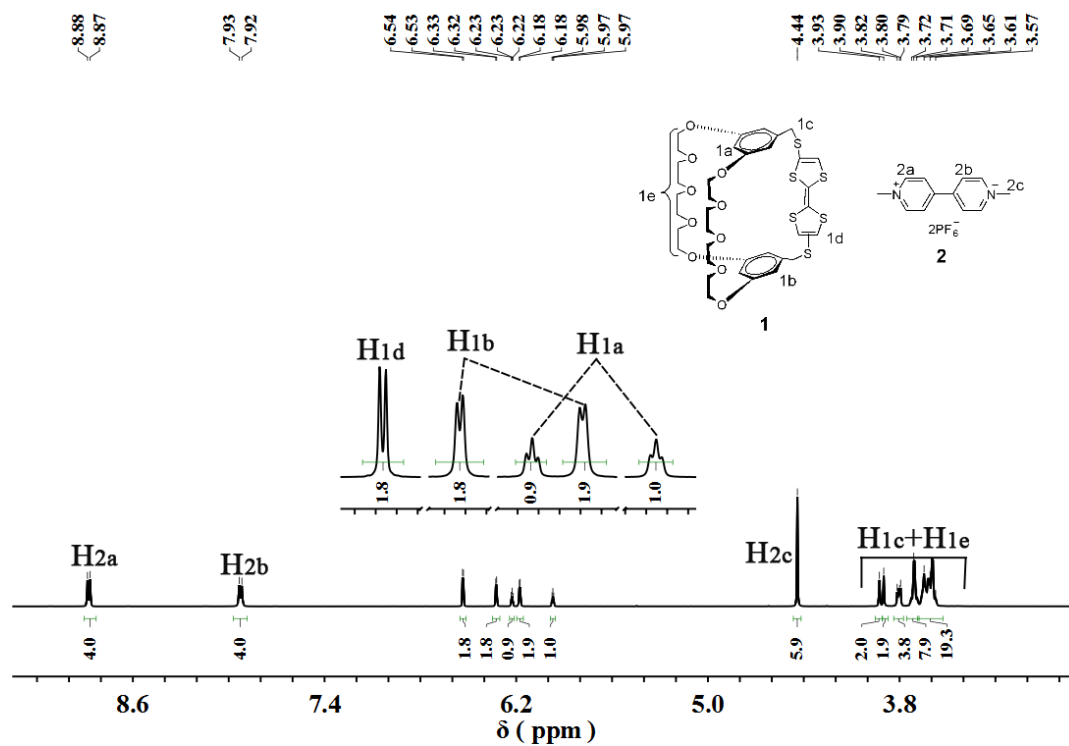

Fig. S6  $^1\text{H}$  NMR spectrum (400 MHz,  $\text{CD}_3\text{CN}$ , 298 K) of a solution of 4.50 mM **1** and 4.50 mM **2**.

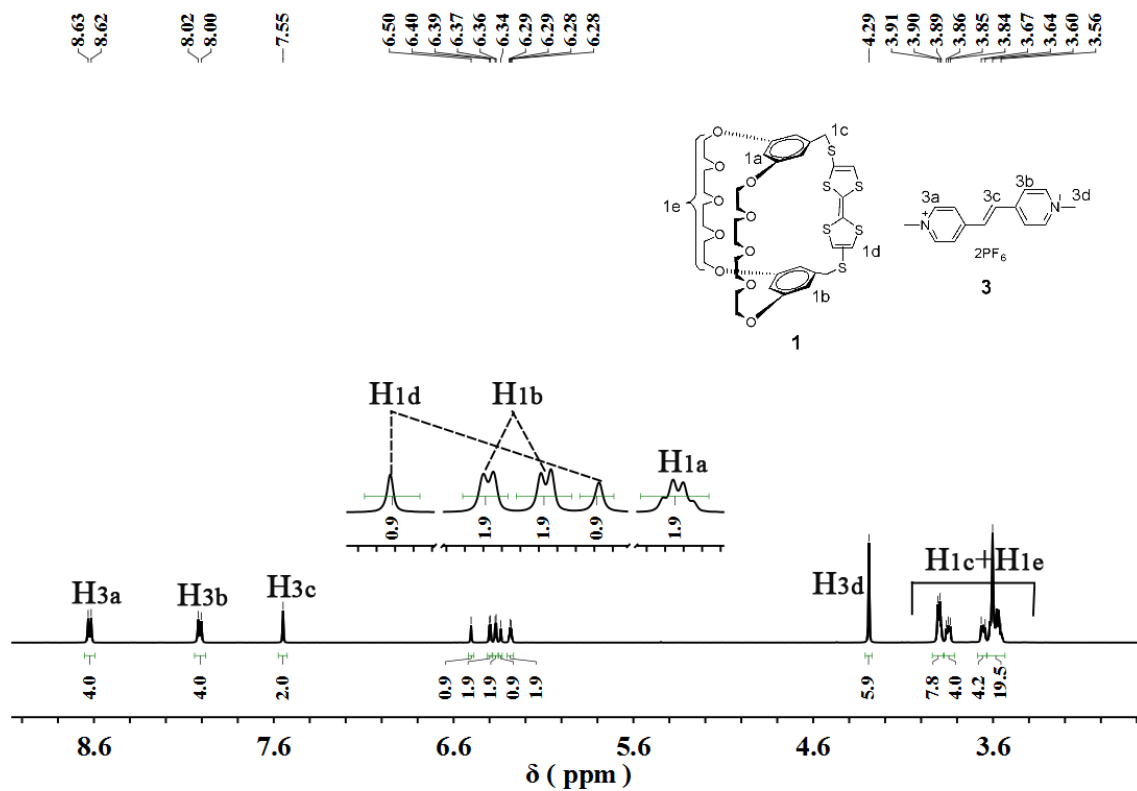

**Fig. S7** <sup>1</sup>H NMR spectrum (400 MHz, CD<sub>3</sub>CN, 298 K) of a solution of 4.50 mM **1** and 4.50 mM **3**.

#### 4. Partial 2D NOESY spectra of **1** ⇌ **2** and **1** ⇌ **3**

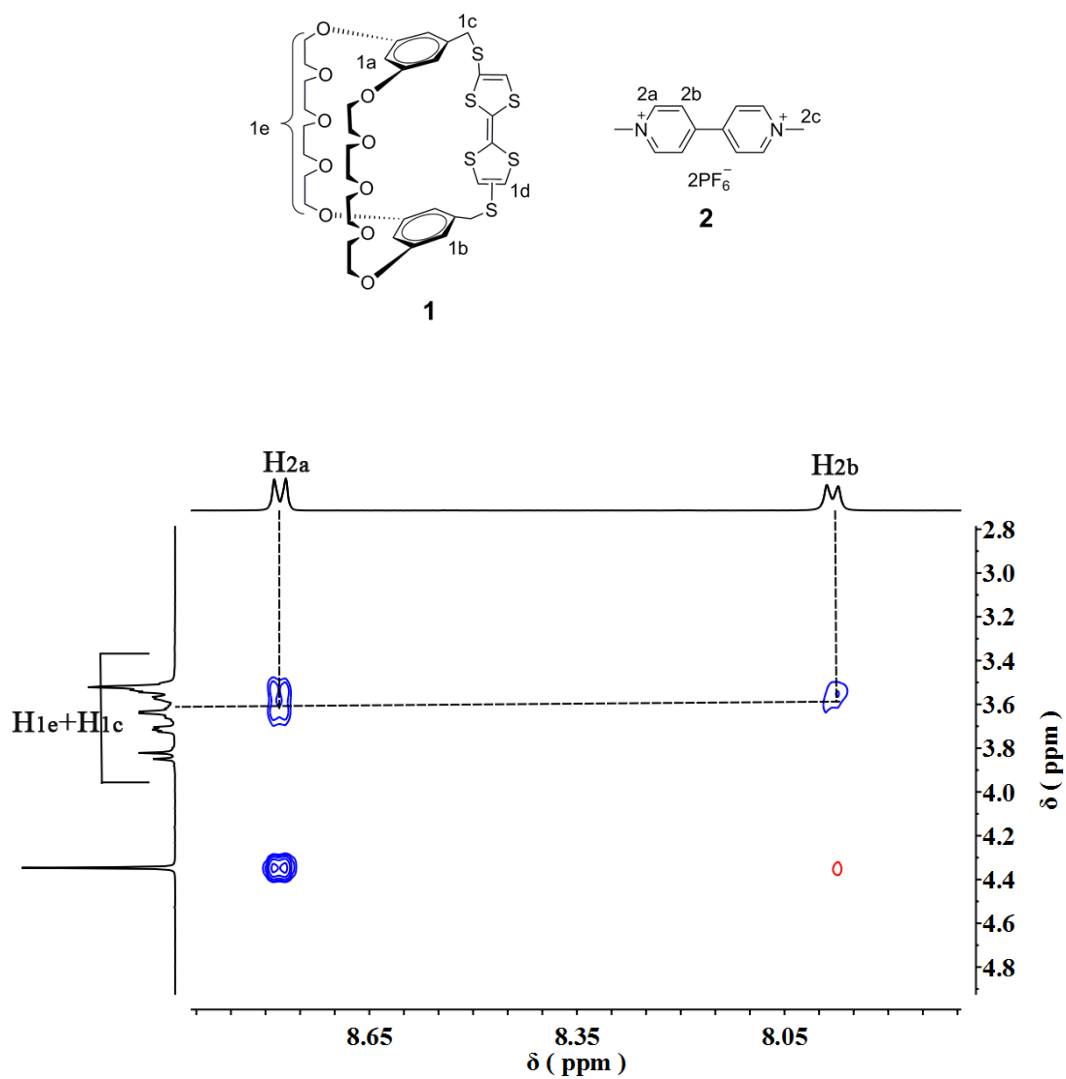

**Fig. S8** Partial 2D NOESY spectrum (400 MHz,  $\text{CD}_3\text{CN}$ , 298 K) of a solution of 4.00 mM **1** and 4.00 mM **2**.

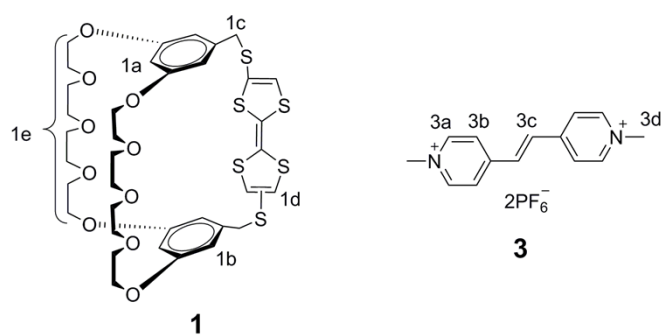



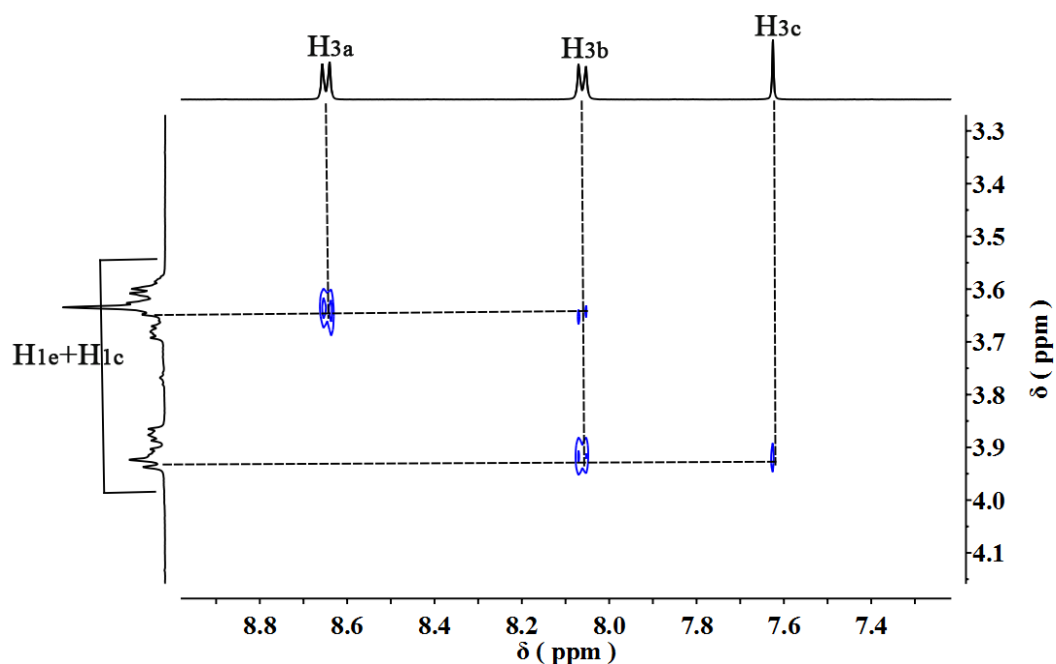

**Fig. S9** Partial 2D NOESY spectrum (400 MHz,  $\text{CD}_3\text{CN}$ , 298 K) of a solution of 4.00 mM **1** and 4.00 mM **3**.

### 5. Job plots for the complexes of **1** $\rightarrow$ **2** and **1** $\rightarrow$ **3**

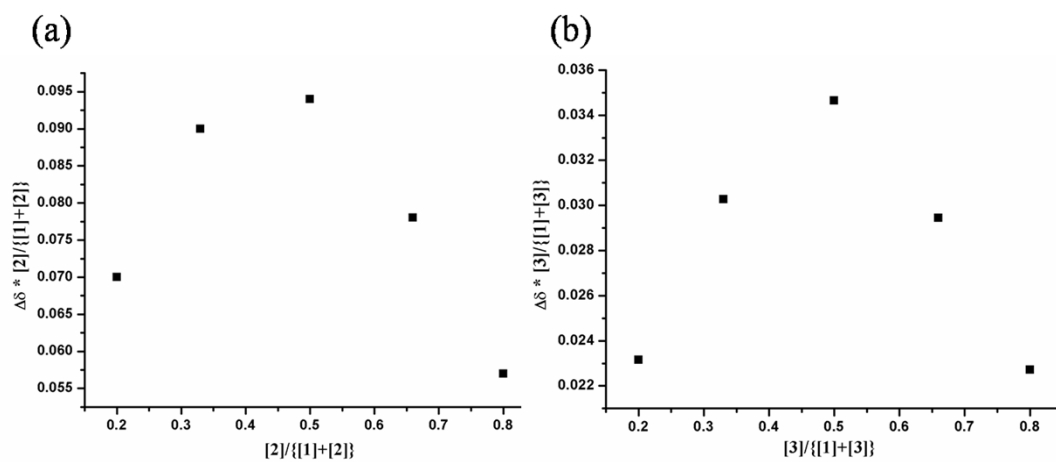

**Fig. S10** Job Plots showing the 1:1 stoichiometry of the complexation between **1** and **2** (a) and **1** and **3** (b) in  $\text{CD}_3\text{CN}$ . ( $[\text{H}] + [\text{G}] = 4 \text{ mM}$ ).

## 6. LR-ESI-MS for the complexes of **1**↷**2** and **1**↷**3**

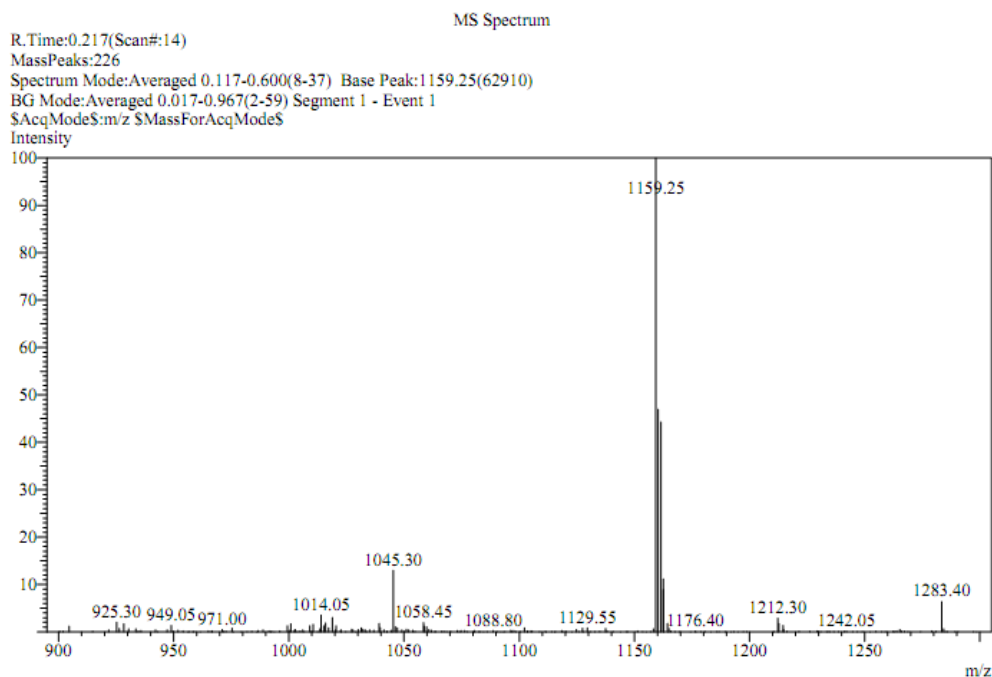

**Fig. S11** LR-ESI-MS of an equimolar mixture of **1** and **2**. Assignment of main peaks:  $m/z$  1159.25 (100%) for  $[\mathbf{1}\mathbf{\rightarrow}\mathbf{2} - \text{PF}_6]^+$ . This result confirmed the 1:1 stoichiometry of the complex between **1** and **2** further.

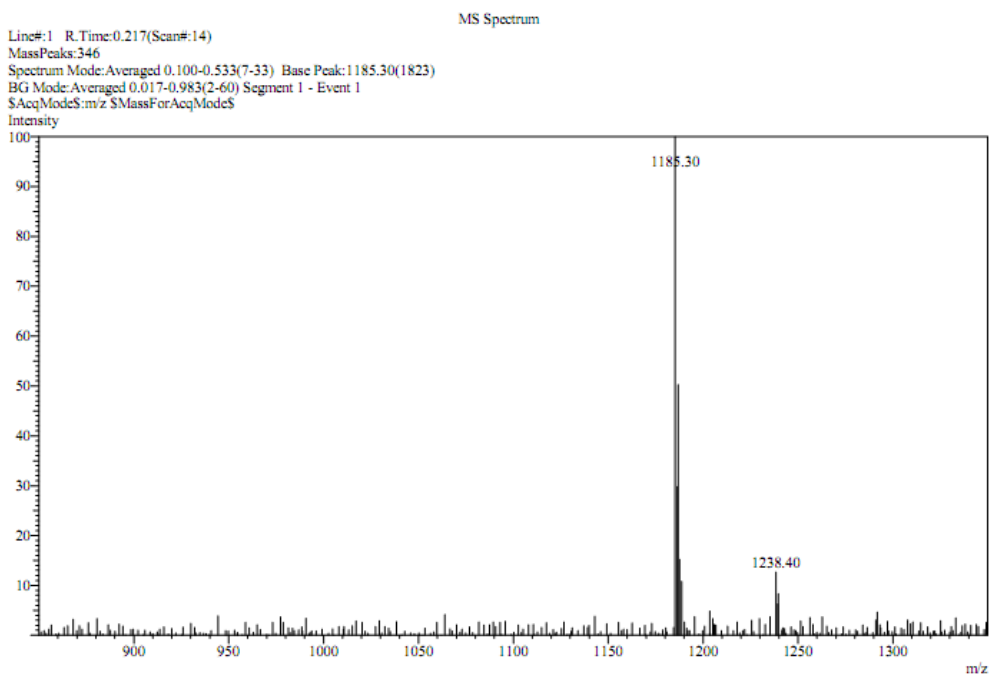

**Fig. S12** LR-ESI-MS of an equimolar mixture of **1** and **3**. Assignment of main peaks:  $m/z$  1185.30 (100%) for  $[\mathbf{1}\mathbf{\rightarrow}\mathbf{3} - \text{PF}_6]^+$ . This result confirmed the 1:1 stoichiometry of the complex between **1** and **3** further.

## 7. Determination of the association constants of **1**↷**2** and **1**↷**3** by <sup>1</sup>H NMR

<sup>1</sup>H NMR titrations were performed with a constant concentration of guest (2.00 mM) and varying concentrations of host in the range of 1.0 – 40.0 mM. Using a non-linear curve-fitting method, the association constant was obtained for each host-guest combination from the following equation:

$$\Delta\delta = (\Delta\delta_{\infty}/[G]_0) (0.5[H]_0 + 0.5([G]_0 + 1/K_a) - (0.5 ([H]_0^2 + (2[H]_0(1/K_a - [G]_0)) + (1/K_a + [G]_0)^2)^{0.5})) \text{ (Eq. S1)}$$

Where  $\Delta\delta$  is the chemical shift change of H<sub>a</sub> on G at [H]<sub>0</sub>,  $\Delta\delta_{\infty}$  is the chemical shift change of H<sub>a</sub> when the guest is completely complexed, [G]<sub>0</sub> is the fixed initial concentration of the guest, and [H]<sub>0</sub> is the initial concentration of the host.

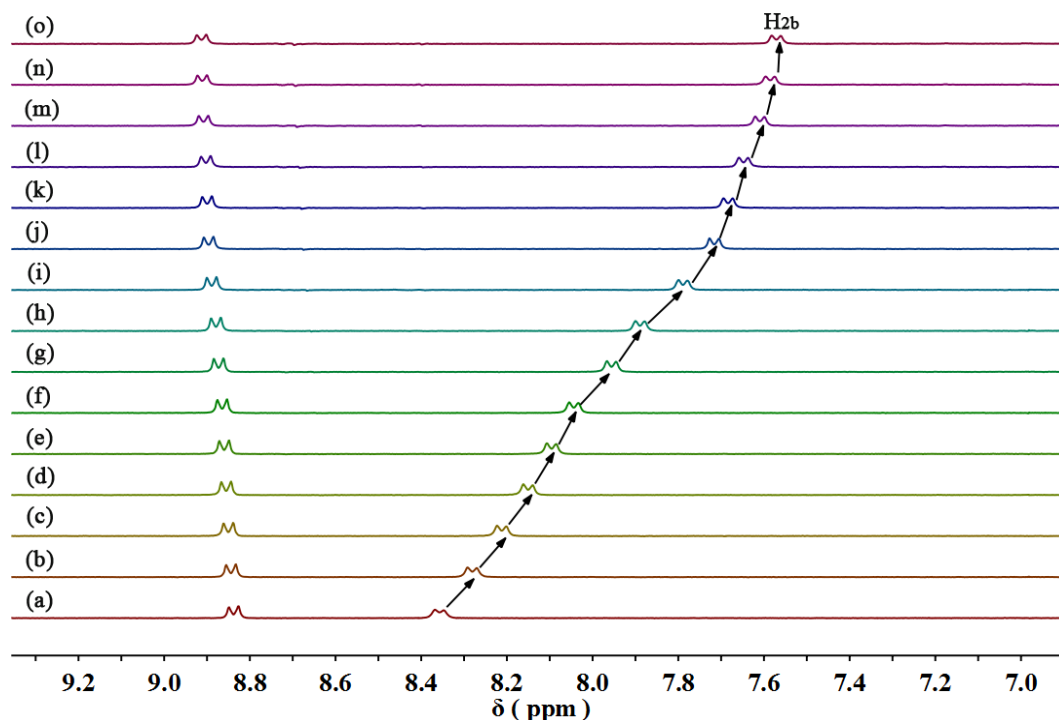

**Fig. S13** Partial <sup>1</sup>H NMR spectral changes (300 MHz, CD<sub>3</sub>CN, 298 K) of **2** at a concentration of 2.00 mM upon gradual addition of **1**: (a) 0.00, (b) 1.00, (c) 2.00, (d) 3.00, (e) 4.00, (f) 5.00, (g) 7.00, (h) 9.00, (i) 13.00, (j) 17.00, (k) 20.00, (l) 24.00, (m) 30.00, (n) 36.00, (o) 40.00 mM.

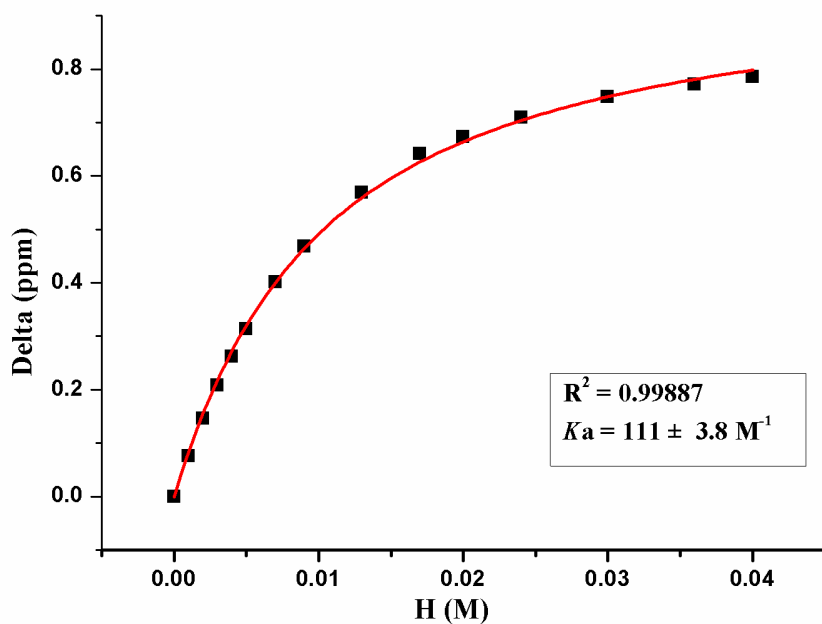

**Fig. S14** The chemical shift changes of H<sub>2b</sub> on **2** upon addition of **1**. The red solid line was obtained from the non-linear curve-fitting using Eq. S1. The association constant ( $K_a$ ) of **1**→**2** was estimated to be about  $111 \pm 3.8 \text{ M}^{-1}$ .

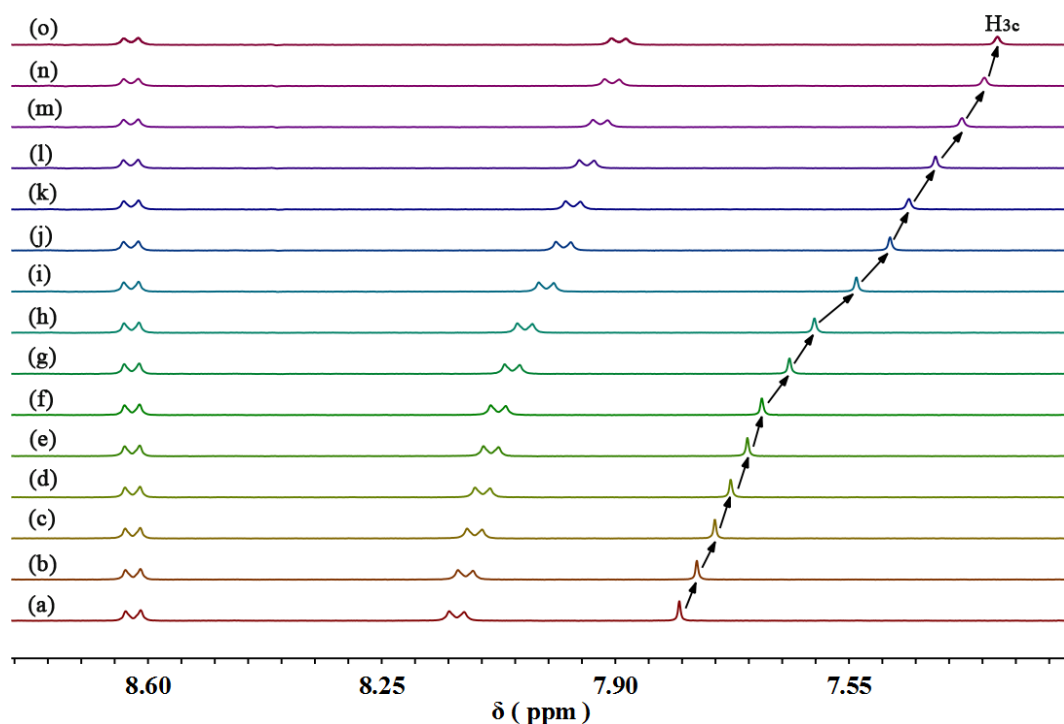

**Fig. S15** Partial <sup>1</sup>H NMR spectral changes (300 MHz, CD<sub>3</sub>CN, 298 K) of **3** at a concentration of 2.00 mM upon gradual addition of **1**: (a) 0.00, (b) 1.00, (c) 2.00, (d) 3.00, (e) 4.00, (f) 5.00, (g) 7.00, (h) 9.00, (i) 13.00, (j) 17.00, (k) 20.00, (l) 24.00, (m) 30.00, (n) 36.00, (o) 40.00 mM.

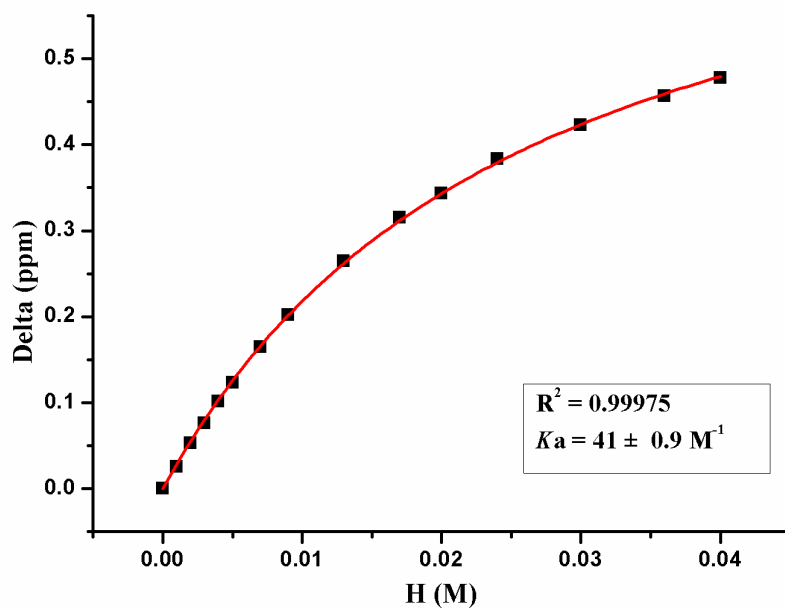

**Fig. S16** The chemical shift changes of  $H_{3c}$  on **3** upon addition of **1**. The red solid line was obtained from the non-linear curve-fitting using Eq. S1. The association constant ( $K_a$ ) of **1**⋯**3** was estimated to be about  $41 \pm 0.9 \text{ M}^{-1}$ .

## 8. Studies of charge transfer interactions by UV-vis spectra

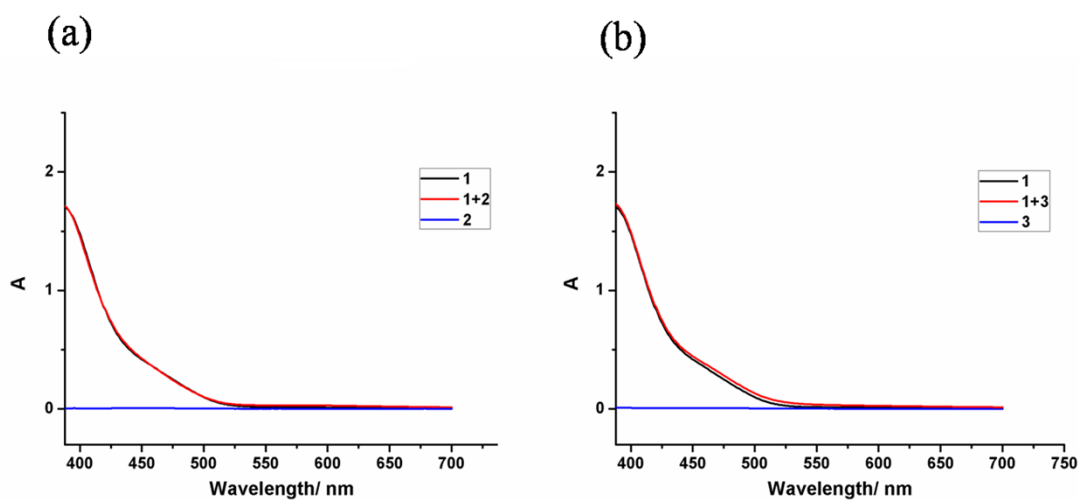

**Fig. S17** UV-vis absorption spectra of between 1.00 mM **1** and 1.00 mM **2** (a) and 1.00 mM **1** and 1.00 mM **3** (b) in  $\text{CH}_3\text{CN}$ .

## 9. Switchable behaviors of **1**⇌**2** investigated by $^1\text{H}$ NMR experiment

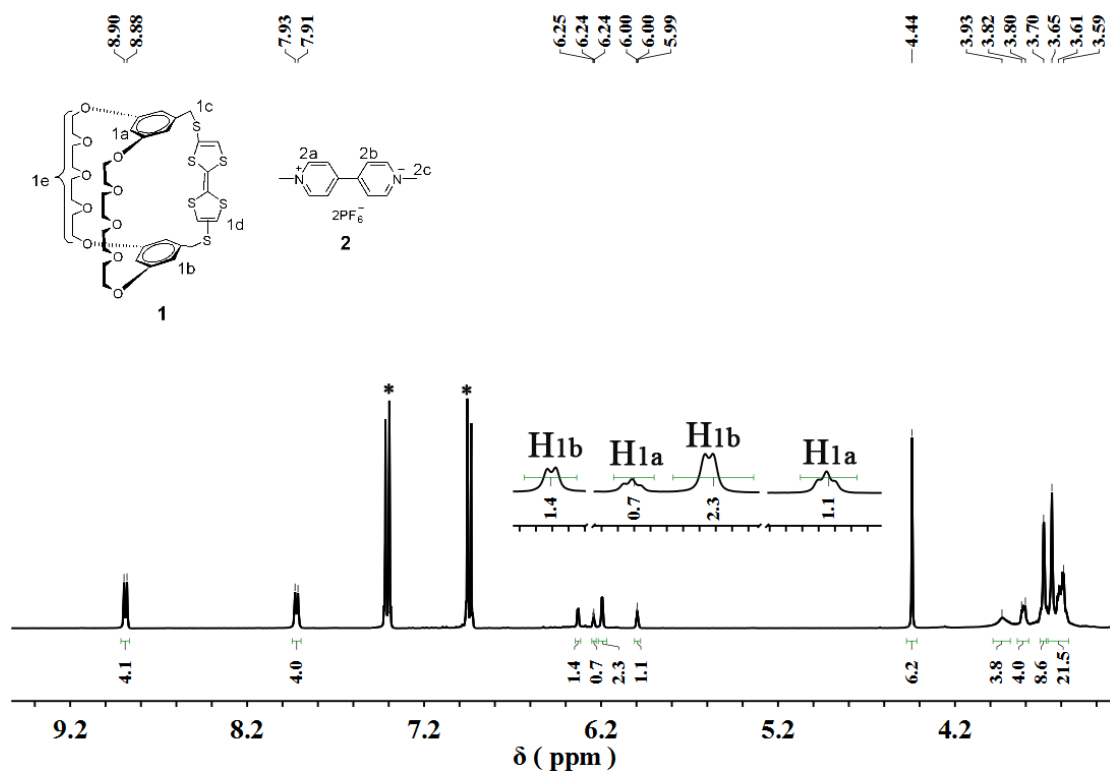

**Fig. S18** Partial  $^1\text{H}$  NMR spectrum (400 MHz,  $\text{CD}_3\text{CN}$ , 298 K) of **1**⇌**2** (1:1, 4.50 mM each) after one oxidation/reduction cycle. The resonances indicated by an asterisk arise from the oxidant.

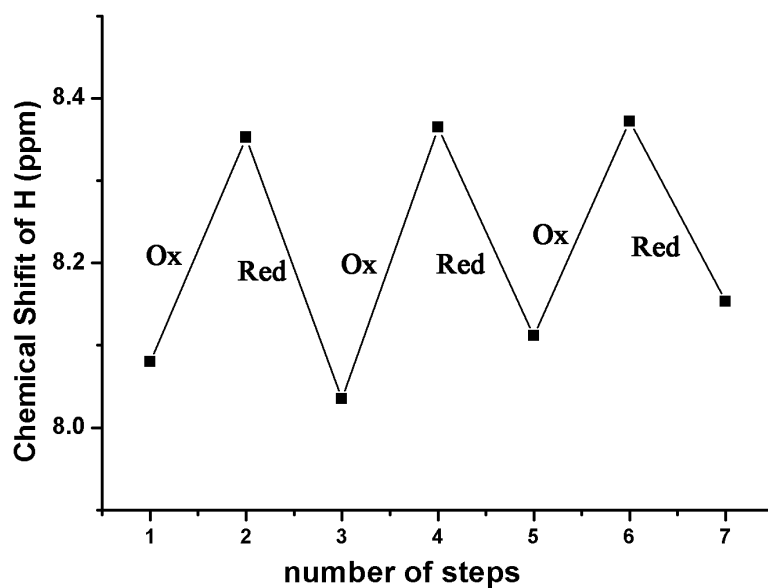

**Fig. S19** The chemical shift changes of  $\text{H}_{2b}$  on **1**⇌**2** (1:1, 4.00 mM each, 400 MHz,  $\text{CD}_3\text{CN}$ , 298 K) upon stepwise addition of oxidant or reductant.

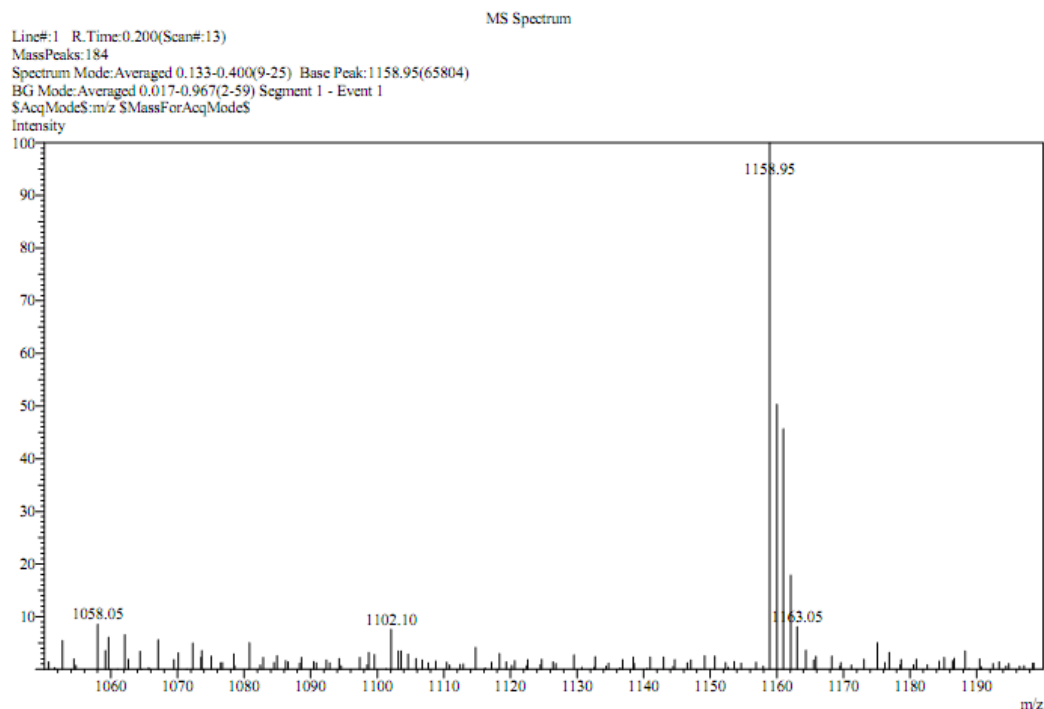

**Fig. S20** LR-ESI-MS of **1** after one oxidation/reduction cycle.

### 10. Redox-responsive complexation between **1** and **3**

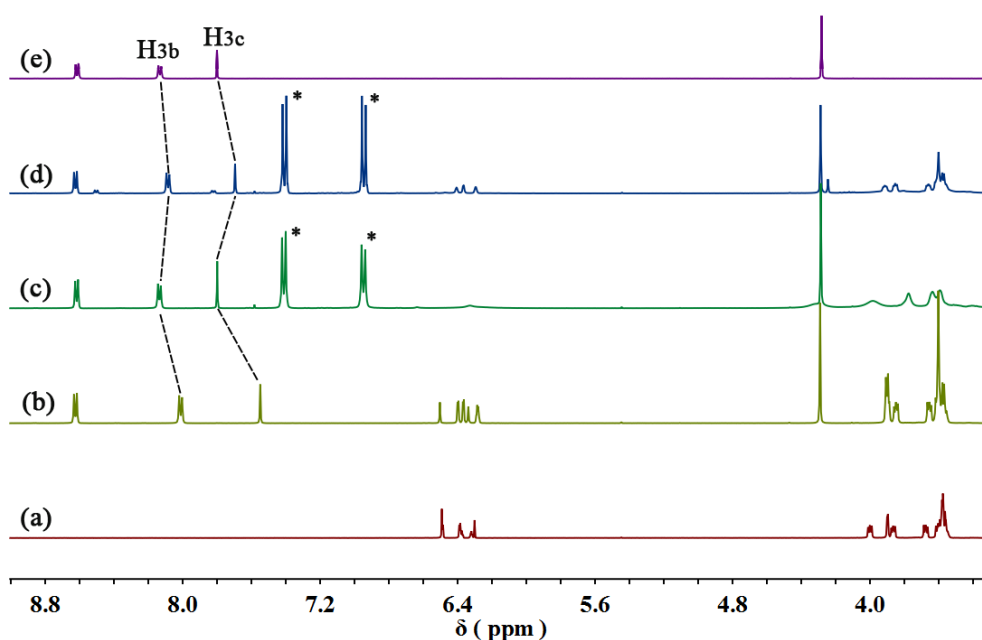

**Fig. S21** Partial  $^1\text{H}$  NMR spectra (400 MHz,  $\text{CD}_3\text{CN}$ , 298 K): (a) **1**; (b) 4.50 mM **1** and 4.50 mM **3**; (c) after addition of 2.2 equiv. of tris(p-bromophenyl)aminium hexachloroantimonate to (b); (d) after addition excess Zn powder to (c); (e) **3**. The resonances indicated by an asterisk arise from the oxidant.

## 11. $^1\text{H}$ NMR spectrum of the single crystal of **1**·**2**

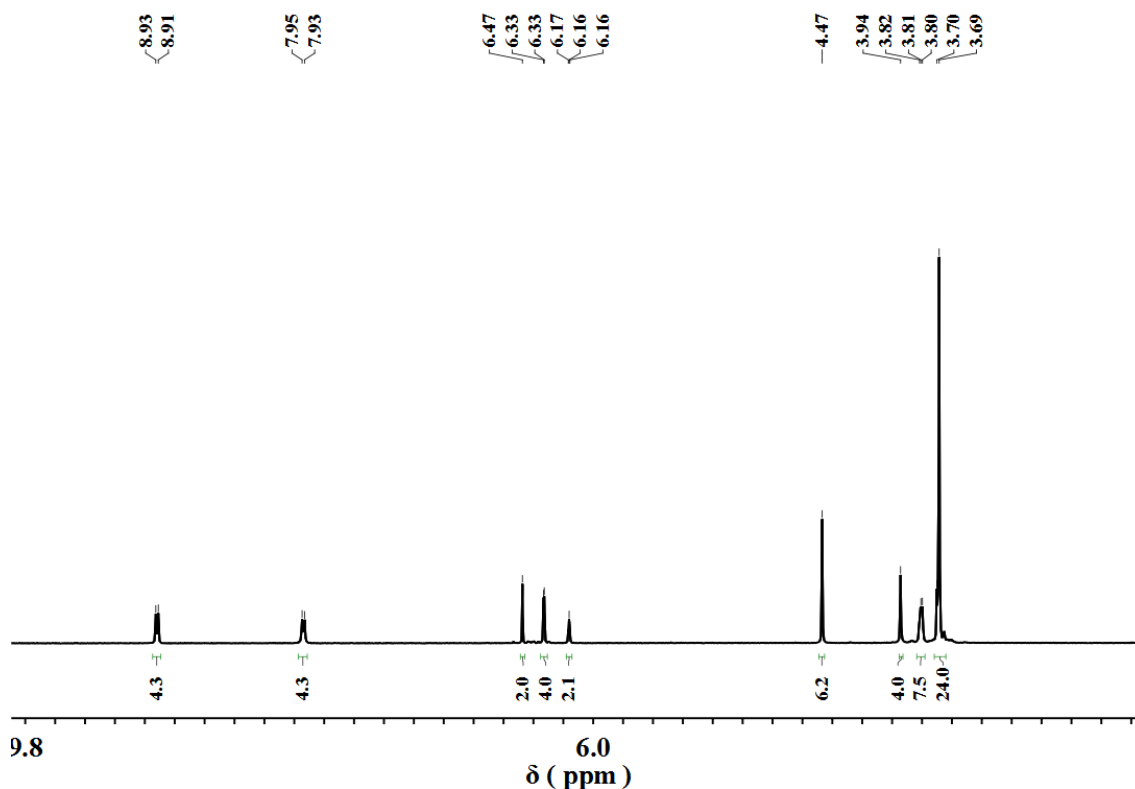

**Fig. S22**  $^1\text{H}$  NMR spectrum (400 MHz,  $\text{CD}_3\text{CN}$ , 298 K) of the single crystal of **1**·**2**.

## 12. X-ray crystal data for **1**·**2**

**Table 1** Crystal data and structure refinement for **1**·**2**

|                   |                                                                                          |
|-------------------|------------------------------------------------------------------------------------------|
| CCDC number       | 1004106                                                                                  |
| Empirical formula | $\text{C}_{96}\text{H}_{116}\text{F}_{24}\text{N}_4\text{O}_{20}\text{P}_4\text{S}_{12}$ |
| Formula weight    | 2610.53                                                                                  |
| Temperature       | 293(2)                                                                                   |
| Wavelength        | 1.54178 Å                                                                                |
| Crystal system    | monoclinic                                                                               |
| Space group       | $Pc$                                                                                     |
| $a$               | 11.7180(2) Å                                                                             |
| $b$               | 25.4446(4) Å                                                                             |
| $c$               | 26.3628(3) Å                                                                             |
| $\alpha$          | 90.00°                                                                                   |
| $\beta$           | 105.6740(10)°                                                                            |
| $\gamma$          | 90.00°                                                                                   |
| Volume            | 7568.0(2) Å <sup>3</sup>                                                                 |
| $Z$               | 2                                                                                        |



|                                      |                                                  |
|--------------------------------------|--------------------------------------------------|
| Density (calculated)                 | 1.146                                            |
| Absorption coefficient               | 2.711                                            |
| F(000)                               | 2696.0                                           |
| Crystal size                         | 0.26 × 0.24 × 0.19 mm <sup>3</sup>               |
| Theta range for data collection      | 2.46 to 55.23°                                   |
| Index ranges                         | −13 ≤ h ≤ 10, −28 ≤ k ≤ 29, −30 ≤ l ≤ 30         |
| Reflections collected                | 29348                                            |
| Independent reflections              | 15250 [R(int) = 0.0459]                          |
| Completeness to theta = 65.00°       | 97.4 %                                           |
| Absorption correction                | multi-scan                                       |
| Refinement method                    | Full-matrix least-squares on $F^2$               |
| Goodness-of-fit on $F^2$             | 1.030                                            |
| Final R indices [ $I > 2\sigma(I)$ ] | $R1 = 0.0680$ , $wR2 = 0.1512$                   |
| R indices (all data)                 | $R1 = 0.1064$ , $wR2 = 0.1611$                   |
| Largest diff. peak and hole          | 0.417 and −0.295 e <sup>−</sup> ·Å <sup>−3</sup> |

## References

- S1. W. S. Bryant, J. W. Jones, P. E. Mason, I. Guzei, A. L. Rheingold, F. R. Fronczek, D. S. Nagvekar and H. W. Gibson, *Org. Lett.*, 1999, **1**, 1001.
- S2. M. T. McCall and D. G. Whitten, *J. Am. Chem. Soc.*, 1969, **91**, 5681.
- S3. H. W. Gibson and D. S. Nagvekar, *Can. J. Chem.*, 1997, **75**, 1375.
- S4. X. Guo, D. Zhang, H. Zhang, Q. Fan, W. Xu, X. Ai, L. Fan and D. Zhu, *Tetrahedron*, 2003, **59**, 4843.
- S5. C. Wang, S. M. Dyar, D. Cao, A. C. Fahrenbach, N. Horwitz, M. T. Colvin, R. Carmieli, C. L. Stern, S. K. Dey, M. R. Wasielewski and J. F. Stoddart, *J. Am. Chem. Soc.*, 2012, **134**, 19136.
